# Supplementary material
Source: PubMed Central journal article supplement (PMC4286680)
Supplement: 17f3e2ec0ad38b8a120450b270da03f1_genetics.114.172049-2.pdf [file 17f3e2ec0ad38b8a120450b270da03f1_genetics.114.172049-2.pdf]

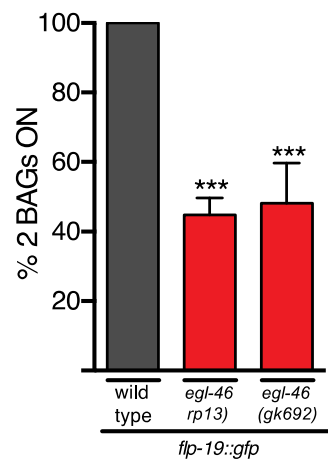

**Figure S2 The *egl-46(gk692)* mutant phenocopies *rp13* for BAG neuronal fate specification defects**

A previously isolated *egl-46(gk692)* deletion allele displays a similar loss of *flp-19::gfp* expression to *rp13*.  $n > 50$ . \*\*\*\* $P < 0.0001$ .
